# Supplementary material for: Enrichment and Proteomic Characterization of the Cyst Wall from In Vitro Toxoplasma gondii Cysts
Source: PubMed Central journal article supplement (PMC6495374; doi:10.1128/mbio.00469-19), 2019-04-30

**A**

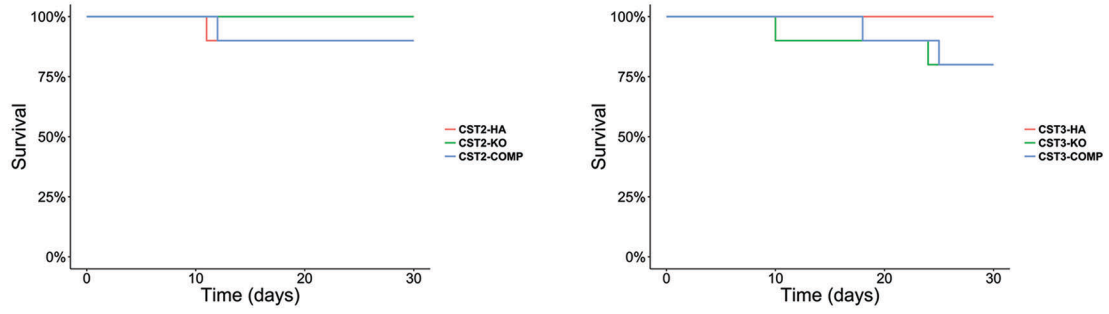

**B**

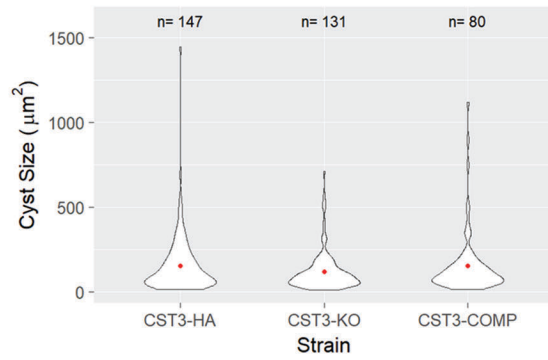

**C**

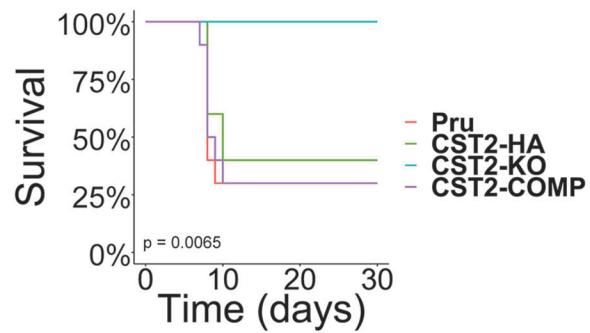

Supplement: mBio.00469-19-sf004.pdf [file mBio.00469-19-sf004.pdf]
